# Supplementary material for: Split Intein-Mediated Protein Ligation for detecting protein-protein interactions and their inhibition
Source: PubMed Central journal article supplement (PMC7229206; doi:10.1038/s41467-020-16299-1), 2020-05-15
Supplement: 41467_2020_16299_MOESM1_ESM.pdf [file 41467_2020_16299_MOESM1_ESM.pdf]

Supplementary Information

**Split Intein-Mediated Protein Ligation, a Method for Detecting Protein-Protein Interactions and Their Inhibition**

Yao et al.

**Supplementary Table 1.** Different constructs of FRB and FKBP1A and their products used in Fig. 2-3

| Name                                    | Description                         | MW (kDa) | Protein sequence                                                                                                                                                                                                                                                                                                                                                                                                                                                       |
|-----------------------------------------|-------------------------------------|----------|------------------------------------------------------------------------------------------------------------------------------------------------------------------------------------------------------------------------------------------------------------------------------------------------------------------------------------------------------------------------------------------------------------------------------------------------------------------------|
| FRB (IN)                                | FRB-HAx2-V5-EN-IN                   | 29.5     | MRVAILLHEMWEHGLEEASRLYFGERNVKGMEVLEPLHAMMERGPQTLKETSFNQAYGR<br>DLMEAQEWCRKYMKSGVKDLTQAWDLYYHVFRRISYPALFYKVVDSRGGGSGGGGSSYP<br>DVPDYAGGSYPYDVPDYAGGSGKIPNPLGLDSTTRSGYCLDLKTQVQTPQGMKEISN<br>IQVGDVLSNTGYNEVLNVFPKSKKSYKITLEDGKEIICSEEHLPFTQTGEMNISGGLK<br>EGMCLYVKEMLKKILKIEEL                                                                                                                                                                                          |
| FRB (NIN)                               | HAx2-V5-EN-IN-FRB                   | 30.7     | MYPYDVPDYAGGSYPYDVPDYAGGSGKIPNPLGLDSTTRSGYCLDLKTQVQTPQGMK<br>EISNIQVGDVLSNTGYNEVLNVFPKSKKSYKITLEDGKEIICSEEHLPFTQTGEMNIS<br>GGLKEGMCLYKEMMLKKILKIEELGGSGGGSGGGSKLTSLYKAGLMRVAILLHEMWE<br>HEGLEEASRLYFGERNVKGMEVLEPLHAMMERGPQTLKETSFNQAYGRDLMEAQEWCRK<br>YMKSGNVKDLTQAWDLYYHVFRRISYPALFYKVV                                                                                                                                                                              |
| FKBP1A (IC)                             | IC-EC-FLAGx3-Myc-FKBP1A             | 22.4     | MDERELIDIEVSGNHLFYANDILTHNSSSDVGTDYKDHGDYKDHIDYKDDDDKGGGGS<br>GGGSEQLISEEDLLTSLYKAGSTMVQVETISPGDGRTPFKRGQTCVHYTGMLDGG<br>KFDSSDRNPKPFKMLGKQEVIRGWEEGVAQMSVQRAKLTISPDYAYGATGHPGIIPP<br>HATLVDFVELLKLLESDPAFLYKVV                                                                                                                                                                                                                                                        |
| FKBP1A (CIC)                            | FKBP1A-IC-EC-FLAGx3-Myc             | 21.8     | MGVQVETISPGDGRTPFKRGQTCVHYTGMLDGGKFDSSDRNPKPFKMLGKQEVIRGW<br>EEGVAQMSVQRAKLTISPDYAYGATGHPGIIPPATLVDFVELLKLLESDPAFLYKVVDS<br>RGGGSGGGSGMDERELIDIEVSGNHLFYANDILTHNSSSDVGTDYKDHGDYKDHID<br>YKDDDDKGGSEQLISEEDL                                                                                                                                                                                                                                                            |
| FKBP1A (CIC-GFP)                        | FKBP1A-IC-EC-FLAGx3-Myc-GFP         | 49.0     | MGVQVETISPGDGRTPFKRGQTCVHYTGMLDGGKFDSSDRNPKPFKMLGKQEVIRGW<br>EEGVAQMSVQRAKLTISPDYAYGATGHPGIIPPATLVDFVELLKLLESDPAFLYKVVDS<br>RGGGSGGGSGMDERELIDIEVSGNHLFYANDILTHNSSSDVGTDYKDHGDYKDHID<br>YKDDDDKGGSEQLISEEDLSRMVSKGEEFTGVVPIILVELDGDVNGHKFVSGEGEGD<br>ATYKLTLLKFICTTGKLPVWPPTLVTTLYGVQCFSRYPDHMKQHDFFKSAMPEGYVQERT<br>IFKDDGNKTRAEVKFEGDTLVNRIELKIDFKEDGNILGHKLEYNYNHNVYIMADKQK<br>NGIKVNFKIRHNIEDGSVQLADHYQQNTPIGDGPVLLPDNHYLSTQSALSKDPNEKRDM<br>VLLLEFVTAAGITLGMDELYK |
| Product of FRB (IN) + FKBP1A (IC)       | FRB-HAx2-V5-EN-EC-FLAGx3-Myc-FKBP1A | 37.6     | MRVAILLHEMWEHGLEEASRLYFGERNVKGMEVLEPLHAMMERGPQTLKETSFNQAYGR<br>DLMEAQEWCRKYMKSGNVKDLTQAWDLYYHVFRRISYPALFYKVVDSRGGGSGGGGSSYP<br>YDVPDYAGGSYPYDVPDYAGGSGKIPNPLGLDSTTRSGYSSDVGTDYKDHGDYK<br>HDIDYKDDDDKGGGSGGGSEQLISEEDLLTSLYKAGSTMVQVETISPGDGRTPFK<br>RGQTCVHYTGMLDGGKFDSSDRNPKPFKMLGKQEVIRGWEEGVAQMSVQRAKLTIS<br>PDYAYGATGHPGIIPPATLVDFVELLKLLESDPAFLYKVV                                                                                                               |
| Product of FRB (IN) + FKBP1A (CIC)      | FRB-HAx2-V5-EN-EC-FLAGx3-Myc        | 20.9     | MRVAILLHEMWEHGLEEASRLYFGERNVKGMEVLEPLHAMMERGPQTLKETSFNQAYGR<br>DLMEAQEWCRKYMKSGNVKDLTQAWDLYYHVFRRISYPALFYKVVDSRGGGSGGGGSSYP<br>YDVPDYAGGSYPYDVPDYAGGSGKIPNPLGLDSTTRSGYSSDVGTDYKDHGDYK<br>HDIDYKDDDDKGGSEQLISEEDL                                                                                                                                                                                                                                                       |
| Product of FRB (NIN) + FKBP1A (IC)      | HAx2-V5-EN-EC-FLAGx3-Myc-FKBP1A     | 24.1     | MYPYDVPDYAGGSYPYDVPDYAGGSGKIPNPLGLDSTTRSGYSSDVGTDYKDHGD<br>YKDHIDYKDDDDKGGGSGGGSEQLISEEDLLTSLYKAGSTMVQVETISPGDGRTPFK<br>RGQTCVHYTGMLDGGKFDSSDRNPKPFKMLGKQEVIRGWEEGVAQMSVQRAKLTIS<br>PDYAYGATGHPGIIPPATLVDFVELLKLLESDPAFLYKVV                                                                                                                                                                                                                                           |
| Product of FRB (NIN) + FKBP1A (CIC-GFP) | HAx2-V5-EN-EC-FLAGx3-Myc-GFP        | 36.6     | MYPYDVPDYAGGSYPYDVPDYAGGSGKIPNPLGLDSTTRSGYSSDVGTDYKDHGD<br>YKDHIDYKDDDDKGGSEQLISEEDLSRMVSKGEEFTGVVPIILVELDGDVNGHKFVSG<br>EGEGDATYKLTLLKFICTTGKLPVWPPTLVTTLYGVQCFSRYPDHMKQHDFFKSAMPE<br>GYVQERTIFKDDGNKTRAEVKFEGDTLVNRIELKIDFKEDGNILGHKLEYNYNHNVY<br>IMADKQKNGIKVNFKIRHNIEDGSVQLADHYQQNTPIGDGPVLLPDNHYLSTQSALSKDP<br>NEKRDMVLLLEFVTAAGITLGMDELYK                                                                                                                        |

**Supplementary Table 2.** Reference sets for evaluating SIMPL assay.

**(a)** Positive reference set (PRS)

| bait    |                                                              | prey      |                                                                        |
|---------|--------------------------------------------------------------|-----------|------------------------------------------------------------------------|
| name    | subcellular localization                                     | name      | subcellular localization                                               |
| AKT1    | cell membrane (associated), cytoplasm, nucleus               | PDPK1     | plasma membrane (peripheral), nucleus, cytosol                         |
| AKT1    | cell membrane (associated), cytoplasm, nucleus               | TCL1A     | nucleus, ER                                                            |
| ARF1    | Golgi apparatus (anchored), plasma membrane (anchored)       | ARFIP2    | plasma membrane, cytosol, Golgi apparatus                              |
| ATF3    | nucleus                                                      | DDIT3     | nucleus                                                                |
| B2M     | extracellular                                                | HLA-A     | plasma membrane, ER, Golgi apparatus                                   |
| B2M     | extracellular                                                | HLA-B     | plasma membrane, ER, Golgi apparatus                                   |
| B2M     | extracellular                                                | HLA-C     | plasma membrane, ER, Golgi apparatus                                   |
| BAD     | mitochondrion (outer membrane), cytoplasm                    | BCL2L1    | mitochondrion, cytoskeleton, nucleus, cytosol                          |
| BAK1    | mitochondrion (outer membrane)                               | BCL2L1    | mitochondrion, cytoskeleton, nucleus, cytosol                          |
| BDNF    | extracellular                                                | NTF4      | extracellular                                                          |
| CASP2   | cytosol, mitochondrion, nucleus                              | CRADD     | nucleus, cytosol                                                       |
| CBLB    | cytoplasm                                                    | GRB2      | plasma membrane, cytoplasm, nucleus                                    |
| CCND3   | nucleus                                                      | CDK6      | nucleus, cytoskeleton, cytosol                                         |
| CD2     | cell membrane                                                | CDS8      | plasma membrane                                                        |
| CDK2    | nucleus, cytoplasm, cytoskeleton, endosome                   | CKS1B     | nucleus                                                                |
| CDKN1A  | nucleus                                                      | CCNA1     | nucleus                                                                |
| CDKN1B  | nucleus, endosome                                            | CCNA1     | nucleus                                                                |
| CEBPG   | nucleus                                                      | FOS       | nucleus, ER, cytosol                                                   |
| CGA     | extracellular                                                | CGB5      | extracellular                                                          |
| CRK     | cytoplasm, nucleus, membrane (associated)                    | PDGFRB    | plasma membrane, lysosome                                              |
| CXCL1   | extracellular                                                | CXCR2     | plasma membrane                                                        |
| DDIT3   | nucleus                                                      | FOS       | nucleus, ER, cytosol                                                   |
| DR1     | nucleus                                                      | DRAP1     | nucleus                                                                |
| ERBB3   | plasma membrane                                              | NRG1      | membrane, extracellular                                                |
| FABP5   | nucleus, cytosol, membrane, extracellular                    | S100A7    | extracellular, cytoplasm, nucleus                                      |
| FEN1    | nucleus                                                      | PCNA      | nucleus                                                                |
| FGF1    | extracellular, cytosol, nucleus                              | FGFR1     | plasma membrane                                                        |
| GADD45A | nucleus                                                      | PCNA      | nucleus                                                                |
| GRAP2   | endosome, cytosol, nucleus                                   | LAT       | plasma membrane                                                        |
| GRB2    | plasma membrane, cytoplasm, nucleus                          | LAT       | plasma membrane                                                        |
| GRB2    | plasma membrane, cytoplasm, nucleus                          | PTK2      | plasma membrane (associated), cytoskeleton, nucleus, cytosol           |
| GRB2    | plasma membrane, cytoplasm, nucleus                          | VAV1      | cytosol, plasma membrane                                               |
| GTF2F1  | nucleus                                                      | GTF2F2    | nucleus                                                                |
| HBA2    | cytosol                                                      | HBB       | cytosol                                                                |
| HDAC1   | nucleus                                                      | RB1       | nucleus                                                                |
| HDAC1   | nucleus                                                      | ZBTB16    | nucleus                                                                |
| HIF1A   | nucleus, cytosol                                             | TP53      | nucleus, mitochondrion, ER                                             |
| IFIT1   | cytoplasm                                                    | EIF3E     | nucleus, cytosol                                                       |
| IGF2    | extracellular                                                | IGFBP4    | extracellular                                                          |
| JUNB    | nucleus                                                      | BATF      | nucleus                                                                |
| LCP2    | cytoplasm                                                    | GRAP2     | endosome, cytosol, nucleus                                             |
| LCP2    | cytoplasm                                                    | NCK1      | plasma membrane, ER, nucleus, cytosol                                  |
| LCP2    | cytoplasm                                                    | VAV1      | cytosol, plasma membrane                                               |
| LGALS3  | extracellular, plasma membrane, nucleus, cytoplasm           | LGALS3BP  | extracellular, nucleus, plasma membrane                                |
| LMNA    | nucleus                                                      | LMNB1     | nucleus                                                                |
| LMNA    | nucleus                                                      | RB1       | nucleus                                                                |
| LSM3    | nucleus                                                      | LSM2      | nucleus                                                                |
| MAD2L1  | nucleus, cytoskeleton, kinetochore                           | MAD1L1    | cytoskeleton, nucleus, kinetochore                                     |
| MAFG    | nucleus                                                      | NFE2L1    | ER, nucleus                                                            |
| MAPK7   | nucleus, cytoplasm                                           | MAP2K5    | nucleus, cytoplasm                                                     |
| MCM2    | nucleus                                                      | MCM3      | nucleus                                                                |
| MCM2    | nucleus                                                      | MCM5      | nucleus, cytosol                                                       |
| NCBP1   | nucleus                                                      | NCBP2     | nucleus                                                                |
| NF2     | plasma membrane (associated), nucleus                        | HGS       | endosome, cytoplasm                                                    |
| NR3C1   | mitochondrion, cytosol, nucleus, cytoskeleton                | HSP90AA1  | plasma membrane, cytoplasm, nucleus                                    |
| NR3C1   | mitochondrion, cytosol, nucleus, cytoskeleton                | RELA      | nucleus, cytoplasm                                                     |
| ORC2    | nucleus                                                      | MCM10     | nucleus                                                                |
| ORC2    | nucleus                                                      | ORC4      | nucleus                                                                |
| PDE4D   | plasma membrane (associated), cytoskeleton                   | RACK1     | plasma membrane, nucleus, mitochondrion, cytosol                       |
| PDGFRB  | plasma membrane, lysosome                                    | PTPN11    | nucleus, cytoplasm                                                     |
| PEX14   | peroxisome                                                   | PEX19     | peroxisome                                                             |
| PEX19   | peroxisome                                                   | PEX11B    | peroxisome                                                             |
| PEX19   | peroxisome                                                   | PEX16     | peroxisome                                                             |
| PEX19   | peroxisome                                                   | PEX3      | peroxisome                                                             |
| PPP3CA  | nucleus, cytosol, plasma membrane (peripheral)               | PPP3R1    | cytosol, plasma membrane (anchored), nucleus                           |
| PRKAR2A | plasma membrane, cytoplasm, nucleus                          | EZR       | plasma membrane (peripheral), cytoskeleton, nucleus, cytosol, endosome |
| PSMD4   | cytosol, nucleus                                             | RAD23A    | nucleus, cytosol                                                       |
| PTK2    | plasma membrane (associated), cytoskeleton, nucleus, cytosol | SRC       | plasma membrane, cytoskeleton, cytoplasm, nucleus, mitochondrion       |
| PTPN11  | nucleus, cytoplasm                                           | FRS2      | plasma membrane, cytosol, endosome                                     |
| RAC1    | plasma membrane (anchored), cytoplasm                        | ARFIP2    | plasma membrane, cytosol, Golgi apparatus                              |
| RAF1    | cytosol, plasma membrane, nucleus                            | RAP1A     | plasma membrane (anchored), endosome                                   |
| RCC1    | nucleus                                                      | RAN       | nucleus, cytosol                                                       |
| RET     | plasma membrane, endosome                                    | FRS2      | plasma membrane, cytosol, endosome                                     |
| RHOA    | cytoskeleton, plasma membrane (anchored)                     | ARHGAP1   | cytoplasm                                                              |
| RIPK2   | cytoplasm                                                    | NOD1      | plasma membrane, cytoplasm                                             |
| RPA2    | nucleus                                                      | RPA3      | nucleus                                                                |
| S100A1  | nucleus, cytoplasm                                           | S100B     | nucleus, cytoplasm                                                     |
| S100A6  | plasma membrane (peripheral), nucleus, cytoplasm             | S100B     | nucleus, cytoplasm                                                     |
| SKP1    | cytoplasm, nucleus                                           | BTRC      | nucleus, cytosol                                                       |
| SKP1    | cytoplasm, nucleus                                           | SKP2      | nucleus, cytoplasm                                                     |
| SMAD1   | nucleus, cytoplasm                                           | SMAD4     | nucleus, cytoplasm                                                     |
| SMAD3   | nucleus, cytoplasm                                           | SMAD4     | nucleus, cytoplasm                                                     |
| SMAD4   | nucleus, cytoplasm                                           | DCP1A     | nucleus                                                                |
| TNFSF10 | extracellular, plasma membrane                               | TNFRSF10B | plasma membrane                                                        |
| TP53    | nucleus, mitochondrion, ER                                   | UBE2I     | nucleus, cytosol                                                       |
| XIAP    | nucleus, cytoplasm                                           | CASP3     | cytoplasm, nucleus                                                     |
| XIAP    | nucleus, cytoplasm                                           | CASP7     | cytoplasm, nucleus                                                     |
| XIAP    | nucleus, cytoplasm                                           | CASP9     | cytosol, mitochondrion                                                 |

- Continued

- Continuing

(b) Random reference set (RRS)

| bait    |                                                        | prey      |                                                                        |
|---------|--------------------------------------------------------|-----------|------------------------------------------------------------------------|
| name    | subcellular localization                               | name      | subcellular localization                                               |
| AKT1    | cell membrane (associated), cytoplasm, nucleus         | PEX19     | peroxisome                                                             |
| ARF1    | Golgi apparatus (anchored), plasma membrane (anchored) | SKP2      | nucleus, cytoplasm                                                     |
| ATF3    | nucleus                                                | LMNB1     | nucleus                                                                |
| B2M     | extracellular                                          | PEX16     | peroxisome                                                             |
| B2M     | extracellular                                          | RAD23A    | nucleus, cytosol                                                       |
| B2M     | extracellular                                          | TP53      | nucleus, mitochondrion, ER                                             |
| BAD     | mitochondrion (outer membrane), cytoplasm              | DCP1A     | nucleus                                                                |
| BAK1    | mitochondrion (outer membrane)                         | RAP1A     | plasma membrane (anchored), endosome                                   |
| BDNF    | extracellular                                          | MAD1L1    | cytoskeleton, nucleus, kinetochore                                     |
| BDNF    | extracellular                                          | MCM5      | nucleus, cytosol                                                       |
| CASP2   | cytosol, mitochondrion, nucleus                        | VAV1      | cytosol, plasma membrane                                               |
| CBLB    | cytoplasm                                              | BCL2L1    | mitochondrion, cytoskeleton, nucleus, cytosol                          |
| CD2     | cell membrane                                          | GTF2F2    | nucleus                                                                |
| CD2     | cell membrane                                          | HGS       | endosome, cytoplasm                                                    |
| CDK2    | nucleus, cytoplasm, cytoskeleton, endosome             | DDIT3     | nucleus                                                                |
| CDKN1A  | nucleus                                                | PEX11B    | peroxisome                                                             |
| CDKN1B  | nucleus, endosome                                      | DRAP1     | nucleus                                                                |
| CEBPG   | nucleus                                                | ARHGAP1   | cytoplasm                                                              |
| CEBPG   | nucleus                                                | CASP9     | cytosol, mitochondrion                                                 |
| CGA     | extracellular                                          | CDS8      | plasma membrane                                                        |
| CGA     | extracellular                                          | MCM3      | nucleus                                                                |
| CGA     | extracellular                                          | NCBP2     | nucleus                                                                |
| CRK     | cytoplasm, nucleus, membrane (associated)              | UBE2I     | nucleus, cytosol                                                       |
| CXCL1   | extracellular                                          | MAP2K5    | nucleus, cytoplasm                                                     |
| CXCL1   | extracellular                                          | ORC4      | nucleus                                                                |
| CXCL1   | extracellular                                          | SMAD4     | nucleus, cytoplasm                                                     |
| DDIT3   | nucleus                                                | NRG1      | membrane, extracellular                                                |
| DR1     | nucleus                                                | NTF4      | extracellular                                                          |
| ERBB3   | plasma membrane                                        | DDIT3     | nucleus                                                                |
| ERBB3   | plasma membrane                                        | PCNA      | nucleus                                                                |
| FABP5   | nucleus, cytosol, membrane, extracellular              | PTK2      | plasma membrane (associated), cytoskeleton, nucleus, cytosol           |
| FEN1    | nucleus                                                | GRAP2     | endosome, cytosol, nucleus                                             |
| FGF1    | extracellular, cytosol, nucleus                        | NCK1      | plasma membrane, ER, nucleus, cytosol                                  |
| FGF1    | extracellular, cytosol, nucleus                        | RB1       | nucleus                                                                |
| GADD45A | nucleus                                                | FRS2      | plasma membrane, cytosol, endosome                                     |
| GADD45A | nucleus                                                | PDPK1     | plasma membrane (peripheral), nucleus, cytosol                         |
| GRAP2   | endosome, cytosol, nucleus                             | NFE2L1    | ER, nucleus                                                            |
| GRB2    | plasma membrane, cytoplasm, nucleus                    | PEX3      | peroxisome                                                             |
| GTF2F1  | nucleus                                                | NOD1      | plasma membrane, cytoplasm                                             |
| HBA2    | cytosol                                                | CKS1B     | nucleus                                                                |
| HDAC1   | nucleus                                                | LAT       | plasma membrane                                                        |
| HDAC1   | nucleus                                                | PPP3R1    | cytosol, plasma membrane (anchored), nucleus                           |
| HIF1A   | nucleus, cytosol                                       | ARFIP2    | plasma membrane, cytosol, Golgi apparatus                              |
| IFIT1   | cytoplasm                                              | RELA      | nucleus, cytoplasm                                                     |
| IGF2    | extracellular                                          | ARFIP2    | plasma membrane, cytosol, Golgi apparatus                              |
| IGF2    | extracellular                                          | HSP90AA1  | plasma membrane, cytoplasm, nucleus                                    |
| IGF2    | extracellular                                          | RPA3      | nucleus                                                                |
| JUNB    | nucleus                                                | PTPN11    | nucleus, cytoplasm                                                     |
| LCP2    | cytoplasm                                              | CRADD     | nucleus, cytosol                                                       |
| LGALS3  | extracellular, plasma membrane, nucleus, cytoplasm     | LSM2      | nucleus                                                                |
| LMNA    | nucleus                                                | PEX3      | peroxisome                                                             |
| LSM3    | nucleus                                                | FGFR1     | plasma membrane                                                        |
| LSM3    | nucleus                                                | LGALS3BP  | extracellular, nucleus, plasma membrane                                |
| MAD2L1  | nucleus, cytoskeleton, kinetochore                     | NFE2L1    | ER, nucleus                                                            |
| MAD2L1  | nucleus, cytoskeleton, kinetochore                     | NTF4      | extracellular                                                          |
| MAFG    | nucleus                                                | PEX11B    | peroxisome                                                             |
| MAFG    | nucleus                                                | TNFRSF10B | plasma membrane                                                        |
| MAPK7   | nucleus, cytoplasm                                     | PEX16     | peroxisome                                                             |
| MCM2    | nucleus                                                | S100B     | nucleus, cytoplasm                                                     |
| NCBP1   | nucleus                                                | S100B     | nucleus, cytoplasm                                                     |
| NF2     | plasma membrane (associated), nucleus                  | FOS       | nucleus, ER, cytosol                                                   |
| NR3C1   | mitochondrion, cytosol, nucleus, cytoskeleton          | RAD23A    | nucleus, cytosol                                                       |
| ORC2    | nucleus                                                | HBB       | cytosol                                                                |
| ORC2    | nucleus                                                | UBE2I     | nucleus, cytosol                                                       |
| PDE4D   | plasma membrane (associated), cytoskeleton             | EZR       | plasma membrane (peripheral), cytoskeleton, nucleus, cytosol, endosome |
| PDGFRB  | plasma membrane, lysosome                              | RAN       | nucleus, cytosol                                                       |
| PEX14   | peroxisome                                             | NRG1      | membrane, extracellular                                                |
| PEX19   | peroxisome                                             | BATF      | nucleus                                                                |
| PPP3CA  | nucleus, cytosol, plasma membrane (peripheral)         | FOS       | nucleus, ER, cytosol                                                   |
| PRKAR2A | plasma membrane, cytoplasm, nucleus                    | SRC       | plasma membrane, cytoskeleton, cytoplasm, nucleus, mitochondrion       |
| PSMD4   | cytosol, nucleus                                       | NOD1      | plasma membrane, cytoplasm                                             |
| PSMD4   | cytosol, nucleus                                       | TCL1A     | nucleus, ER                                                            |
| RAC1    | plasma membrane (anchored), cytoplasm                  | BTRC      | nucleus, cytosol                                                       |
| RCC1    | nucleus                                                | CASP7     | cytoplasm, nucleus                                                     |
| RET     | plasma membrane, endosome                              | NCBP2     | nucleus                                                                |
| RHOA    | cytoskeleton, plasma membrane (anchored)               | CCNA1     | nucleus                                                                |
| RHOA    | cytoskeleton, plasma membrane (anchored)               | ZBTB16    | nucleus                                                                |
| RIPK2   | cytoplasm                                              | IGFBP4    | extracellular                                                          |
| RIPK2   | cytoplasm                                              | PDGFRB    | plasma membrane, lysosome                                              |
| RPA2    | nucleus                                                | S100A7    | extracellular, cytoplasm, nucleus                                      |
| S100A1  | nucleus, cytoplasm                                     | CASP3     | cytoplasm, nucleus                                                     |
| S100A6  | plasma membrane (peripheral), nucleus, cytoplasm       | RAN       | nucleus, cytosol                                                       |
| SKP1    | cytoplasm, nucleus                                     | CXCR2     | plasma membrane                                                        |
| SMAD1   | nucleus, cytoplasm                                     | GRB2      | plasma membrane, cytoplasm, nucleus                                    |
| SMAD3   | nucleus, cytoplasm                                     | CXCR2     | plasma membrane                                                        |
| SMAD4   | nucleus, cytoplasm                                     | LAT       | plasma membrane                                                        |
| TNFSF10 | extracellular, plasma membrane                         | CDK6      | nucleus, cytoskeleton, cytosol                                         |
| XIAP    | nucleus, cytoplasm                                     | ARFIP2    | plasma membrane, cytosol, Golgi apparatus                              |

Supplementary Table 3. Detection of reference sets with SIMPL.

(a) Detection with SIMPL in bait-IN/C-prey format

| bait    | prey     | reference set | RLU mean | RLU sd | SIMPL result |
|---------|----------|---------------|----------|--------|--------------|
| RPA2    | RPA3     | PRS           | 3.4432   | 0.3631 | positive     |
| DR1     | DRAP1    | PRS           | 2.8255   | 0.4781 | positive     |
| CCND3   | CDK6     | PRS           | 2.6886   | 0.2360 | positive     |
| JUNB    | BATF     | PRS           | 2.6670   | 0.3886 | positive     |
| LSM3    | LSM2     | PRS           | 2.5840   | 0.3028 | positive     |
| GT2F2   | GT2F2    | PRS           | 2.1478   | 0.3250 | positive     |
| BAK1    | BCL2L1   | PRS           | 2.0739   | 0.2237 | positive     |
| PEX14   | PEX19    | PRS           | 2.0669   | 0.1983 | positive     |
| CLB8    | GRB2     | PRS           | 1.9893   | 0.6659 | positive     |
| HBA2    | HBB      | PRS           | 1.8942   | 0.0060 | positive     |
| PEX19   | PEX3     | PRS           | 1.8937   | 0.0574 | positive     |
| BAD     | BCL2L1   | PRS           | 1.7771   | 0.2071 | positive     |
| PPP3CA  | PPP3R1   | PRS           | 1.7320   | 0.2225 | positive     |
| CDK2    | CKS1B    | PRS           | 1.6499   | 0.1770 | positive     |
| ERBB3   | NRG1     | PRS           | 1.5434   | 0.6700 | positive     |
| FEN1    | PCNA     | PRS           | 1.2627   | 0.1536 | positive     |
| ATF3    | DDIT3    | PRS           | 1.2622   | 0.1849 | positive     |
| LCP2    | GRAP2    | PRS           | 1.1838   | 0.1851 | positive     |
| S100A1  | S100B    | PRS           | 1.1498   | 0.1606 | positive     |
| LMNA    | LMNB1    | PRS           | 1.1180   | 0.1548 | positive     |
| NF2     | HGS      | PRS           | 1.0724   | 0.2408 | positive     |
| NCBP1   | NCBP2    | PRS           | 1.0597   | 0.1701 | positive     |
| PEX19   | PEX16    | PRS           | 1.0292   | 0.1177 | positive     |
| HIF1A   | TP53     | PRS           | 1.0262   | 0.1409 | positive     |
| RIPK2   | NOD1     | PRS           | 1.0134   | 0.1334 | positive     |
| SKP1A   | BTRC     | PRS           | 1.0033   | 0.0818 | positive     |
| CASP2   | CRADD    | PRS           | 0.9143   | 0.0988 | positive     |
| PEX19   | PEX11B   | PRS           | 0.8860   | 0.0670 | positive     |
| TNFSF10 | TNFSF10B | PRS           | 0.8622   | 0.1170 | positive     |
| GADD45A | FRS2     | PRS           | 0.8477   | 0.1434 | positive     |
| XIAP    | CASP9    | PRS           | 0.8388   | 0.0395 | positive     |
| RET     | FRS2     | PRS           | 0.7796   | 0.1145 | positive     |
| CASP2   | VAV1     | PRS           | 0.7738   | 0.4035 | positive     |
| FABP5   | S100A7   | PRS           | 0.7703   | 0.0242 | positive     |
| CEBPB   | FOS      | PRS           | 0.7644   | 0.3913 | positive     |
| MAFK7   | NFE2L1   | PRS           | 0.7280   | 0.2500 | positive     |
| CD2     | CD58     | PRS           | 0.7039   | 0.0441 | positive     |
| RIPK2   | PDGFRB   | PRS           | 0.7012   | 0.0385 | positive     |
| HDAC1   | ZBTB16   | PRS           | 0.6820   | 0.4423 | positive     |
| RET     | NCBP2    | PRS           | 0.6734   | 0.3991 | positive     |
| IFIT1   | EIF3E    | PRS           | 0.6638   | 0.3544 | positive     |
| LMNA    | RB1      | PRS           | 0.6623   | 0.2735 | positive     |
| IGF2    | IGFBP4   | PRS           | 0.6385   | 0.1557 | positive     |
| NR3C1   | HSP90AA1 | PRS           | 0.6146   | 0.0308 | positive     |
| CC1     | RAN      | PRS           | 0.6139   | 0.1312 | positive     |
| RIPK2   | IGFBP4   | PRS           | 0.6059   | 0.0301 | negative     |
| PDE4D   | RACK1    | PRS           | 0.5972   | 0.0294 | negative     |
| HDAC1   | RB1      | PRS           | 0.5959   | 0.0286 | negative     |
| PEX14   | NRG1     | PRS           | 0.5888   | 0.0438 | negative     |
| S100A6  | S100B    | PRS           | 0.5874   | 0.0182 | negative     |
| GADD45A | PDPK1    | PRS           | 0.5841   | 0.0095 | negative     |
| MAPK7   | MAP2K5   | PRS           | 0.5642   | 0.0233 | negative     |
| PSMD4   | RAD23A   | PRS           | 0.5577   | 0.0557 | negative     |
| IGF2    | RPA3     | PRS           | 0.5443   | 0.0322 | negative     |
| CDKN1A  | CCNA1    | PRS           | 0.5356   | 0.1474 | negative     |
| PTK2    | SRC      | PRS           | 0.5319   | 0.0367 | negative     |
| RAF1    | RAP1A    | PRS           | 0.5305   | 0.0936 | negative     |
| NR3C1   | REL      | PRS           | 0.5280   | 0.1268 | negative     |
| LCP2    | NCK1     | PRS           | 0.4820   | 0.0316 | negative     |
| BAD     | DCP1A    | PRS           | 0.4796   | 0.0683 | negative     |
| NF2     | FOS      | PRS           | 0.4749   | 0.0968 | negative     |
| SMAD4   | DCP1A    | PRS           | 0.4734   | 0.0803 | negative     |
| S100A1  | CASP3    | PRS           | 0.4714   | 0.0458 | negative     |
| MCM2    | MCM3     | PRS           | 0.4644   | 0.0526 | negative     |
| RAC1    | ARFIP2   | PRS           | 0.4452   | 0.0384 | negative     |
| BAK1    | RAP1A    | PRS           | 0.4413   | 0.1913 | negative     |
| DDIT3   | FOS      | PRS           | 0.4361   | 0.0525 | negative     |
| FGF1    | NCK1     | PRS           | 0.4314   | 0.0122 | negative     |
| MAFK7   | PEX11B   | PRS           | 0.4226   | 0.0877 | negative     |
| CEBPB   | CASP9    | PRS           | 0.4163   | 0.1929 | negative     |
| PTPN11  | FRS2     | PRS           | 0.4053   | 0.1141 | negative     |
| RAF1    | ARFIP2   | PRS           | 0.4037   | 0.0272 | negative     |
| IFIT1   | REL      | PRS           | 0.3984   | 0.0852 | negative     |
| MAFK7   | TNFSF10B | PRS           | 0.3964   | 0.0726 | negative     |
| HIF1A   | ARFIP2   | PRS           | 0.3917   | 0.0704 | negative     |
| ORC2    | MCM10    | PRS           | 0.3911   | 0.0303 | negative     |
| ATF3    | LMNB1    | PRS           | 0.3878   | 0.0598 | negative     |
| BDNF    | NTF4     | PRS           | 0.3704   | 0.0853 | negative     |
| CRK     | UBE2I    | PRS           | 0.3665   | 0.0331 | negative     |
| CDKN1B  | CCNA1    | PRS           | 0.3659   | 0.1165 | negative     |
| IGF2    | HSP90AA1 | PRS           | 0.3610   | 0.1050 | negative     |
| MAD2L1  | MAD1L1   | PRS           | 0.3560   | 0.0458 | negative     |
| AKT1    | PDPK1    | PRS           | 0.3493   | 0.0243 | negative     |
| ORC2    | ORC4     | PRS           | 0.3385   | 0.0656 | negative     |
| MCM2    | S100B    | PRS           | 0.3360   | 0.0200 | negative     |
| RHOA    | ARHGAP1  | PRS           | 0.3216   | 0.0633 | negative     |
| IGF2    | ARFIP2   | PRS           | 0.3180   | 0.2286 | negative     |
| NCBP1   | S100B    | PRS           | 0.3175   | 0.1453 | negative     |
| AKT1    | TCL1A    | PRS           | 0.3071   | 0.0383 | negative     |
| BDNF    | MAD1L1   | PRS           | 0.3025   | 0.1799 | negative     |
| JUNB    | PTPN11   | PRS           | 0.2965   | 0.0640 | negative     |
| ERBB3   | DDIT3    | PRS           | 0.2921   | 0.0671 | negative     |
| PDGFRB  | PTPN11   | PRS           | 0.2892   | 0.0103 | negative     |
| TNFSF10 | CDK6     | PRS           | 0.2847   | 0.0237 | negative     |
| FGF1    | RB1      | PRS           | 0.2767   | 0.0291 | negative     |
| XIAP    | ARFIP2   | PRS           | 0.2730   | 0.0261 | negative     |
| SMAD3   | SMAD4    | PRS           | 0.2678   | 0.0461 | negative     |
| BDNF    | MCM5     | PRS           | 0.2600   | 0.0444 | negative     |
| PSMD4   | TCL1A    | PRS           | 0.2458   | 0.0368 | negative     |
| CGA     | CGB5     | PRS           | 0.2458   | 0.0653 | negative     |
| XIAP    | CASP3    | PRS           | 0.2444   | 0.0266 | negative     |
| CXCL1   | CXCR2    | PRS           | 0.2441   | 0.0244 | negative     |
| HDAC1   | PPP3R1   | PRS           | 0.2428   | 0.1576 | negative     |
| CD2     | HGS      | PRS           | 0.2394   | 0.0189 | negative     |
| CLB8    | BCL2L1   | PRS           | 0.2388   | 0.0662 | negative     |
| XIAP    | CASP7    | PRS           | 0.2274   | 0.0121 | negative     |
| FEN1    | GRAP2    | PRS           | 0.2249   | 0.0246 | negative     |
| PEX19   | BATF     | PRS           | 0.2231   | 0.0156 | negative     |
| AKT1    | PEX19    | PRS           | 0.2170   | 0.1564 | negative     |
| HDAC1   | LAT      | PRS           | 0.2144   | 0.0078 | negative     |
| SMAD4   | LAT      | PRS           | 0.2118   | 0.0374 | negative     |
| TP53    | UBE2I    | PRS           | 0.2117   | 0.0324 | negative     |
| HBA2    | CKS1B    | PRS           | 0.2111   | 0.0309 | negative     |
| RHOA    | ZBTB16   | PRS           | 0.2108   | 0.0398 | negative     |
| CGA     | CD58     | PRS           | 0.2106   | 0.0212 | negative     |
| GRAP2   | LAT      | PRS           | 0.2084   | 0.0407 | negative     |
| GRB2    | PTK2     | PRS           | 0.2078   | 0.0279 | negative     |
| MCM2    | MCM5     | PRS           | 0.2022   | 0.0462 | negative     |
| NR3C1   | RAD23A   | PRS           | 0.1958   | 0.1008 | negative     |
| SMAD1   | SMAD4    | PRS           | 0.1937   | 0.0254 | negative     |
| RAF1    | SKP2     | PRS           | 0.1903   | 0.0234 | negative     |
| LCP2    | VAV1     | PRS           | 0.1881   | 0.0068 | negative     |
| LSM3    | LGALS3BP | PRS           | 0.1875   | 0.0665 | negative     |
| B2M     | HLA-C    | PRS           | 0.1875   | 0.0347 | negative     |
| FABP5   | PTK2     | PRS           | 0.1837   | 0.0038 | negative     |
| LGALS3  | LSM2     | PRS           | 0.1794   | 0.0490 | negative     |
| CDK2    | DDIT3    | PRS           | 0.1786   | 0.0530 | negative     |
| PSMD4   | NOD1     | PRS           | 0.1762   | 0.0201 | negative     |
| LSM3    | FGFR1    | PRS           | 0.1749   | 0.0246 | negative     |
| PDGFRB  | RAN      | PRS           | 0.1711   | 0.0369 | negative     |
| ORC2    | HBB      | PRS           | 0.1695   | 0.0481 | negative     |
| RAC1    | BTRC     | PRS           | 0.1679   | 0.0335 | negative     |
| ORC2    | UBE2I    | PRS           | 0.1663   | 0.0149 | negative     |
| DDIT3   | NRG1     | PRS           | 0.1649   | 0.0664 | negative     |
| MAD2L1  | NTF4     | PRS           | 0.1647   | 0.0587 | negative     |
| CDKN1A  | PEX11B   | PRS           | 0.1630   | 0.1186 | negative     |
| GRB2    | LAT      | PRS           | 0.1585   | 0.0421 | negative     |
| RC1     | CASP7    | PRS           | 0.1530   | 0.0145 | negative     |
| RHOA    | CCNA1    | PRS           | 0.1528   | 0.1188 | negative     |
| LMNA    | PEX3     | PRS           | 0.1484   | 0.0408 | negative     |
| S100A6  | RAN      | PRS           | 0.1435   | 0.0207 | negative     |
| LGALS3  | LGALS3BP | PRS           | 0.1411   | 0.0338 | negative     |
| GADD45A | PCNA     | PRS           | 0.1400   | 0.0118 | negative     |
| PPP3CA  | FOS      | PRS           | 0.1371   | 0.0615 | negative     |
| PDE4D   | EZR      | PRS           | 0.1367   | 0.0274 | negative     |
| B2M     | HLA-A    | PRS           | 0.1366   | 0.0339 | negative     |
| CDKN1B  | DRAP1    | PRS           | 0.1353   | 0.0227 | negative     |
| RPA2    | S100A7   | PRS           | 0.1315   | 0.0147 | negative     |
| B2M     | HLA-B    | PRS           | 0.1279   | 0.0164 | negative     |
| SKP1A   | SKP2     | PRS           | 0.1250   | 0.0104 | negative     |
| ERBB3   | PCNA     | PRS           | 0.1231   | 0.0572 | negative     |
| LCP2    | CRADD    | PRS           | 0.1229   | 0.0160 | negative     |
| SMAD3   | CXCR2    | PRS           | 0.1226   | 0.0229 | negative     |
| GT2F2   | NOD1     | PRS           | 0.1222   | 0.0076 | negative     |
| SMAD1   | GRB2     | PRS           | 0.1194   | 0.0140 | negative     |
| GRB2    | VAV1     | PRS           | 0.1189   | 0.0135 | negative     |
| FGF1    | FGFR1    | PRS           | 0.1174   | 0.0158 | negative     |
| MAPK7   | PEX16    | PRS           | 0.1127   | 0.0193 | negative     |
| CRK     | PDGFRB   | PRS           | 0.1125   | 0.0247 | negative     |
| PRKAR2A | SRC      | PRS           | 0.1114   | 0.0122 | negative     |
| SKP1A   | CXCR2    | PRS           | 0.1059   | 0.0220 | negative     |
| PRKAR2A | EZR      | PRS           | 0.1054   | 0.0162 | negative     |
| CD2     | GT2F2    | PRS           | 0.1015   | 0.0233 | negative     |
| CXCL1   | SMAD4    | PRS           | 0.0943   | 0.0366 | negative     |
| CXCL1   | MAP2K5   | PRS           | 0.0939   | 0.0254 | negative     |
| CXCL1   | ORC4     | PRS           | 0.0832   | 0.0224 | negative     |
| CGA     | MCM3     | PRS           | 0.0812   | 0.0197 | negative     |
| DR1     | NTF4     | PRS           | 0.0810   | 0.0256 | negative     |
| GRAP2   | NFE2L1   | PRS           | 0.0807   | 0.0225 | negative     |
| CGA     | NCBP2    | PRS           | 0.0703   | 0.0116 | negative     |
| B2M     | PEX16    | PRS           | 0.0630   | 0.0070 | negative     |
| B2M     | TP53     | PRS           | 0.0561   | 0.0060 | negative     |
| CEBPB   | ARHGAP1  | PRS           | 0.0555   | 0.0444 | negative     |
| MAD2L1  | NFE2L1   | PRS           | 0.0465   | 0.0124 | negative     |
| GRB2    | PEX3     | PRS           | 0.0408   | 0.0085 | negative     |
| B2M     | RAD23A   | PRS           | 0.0389   | 0.0088 | negative     |

(b) Detection with SIMPL in bait-IN/prey-CiC format

| bait    | prey     | reference set | RLU mean | RLU sd | SIMPL result |
|---------|----------|---------------|----------|--------|--------------|
| DR1     | DRAP1    | PRS           | 3.9699   | 0.4737 | positive     |
| GT2F2   | GT2F2    | PRS           | 3.2408   | 0.3796 | positive     |
| LSM3    | LSM2     | PRS           | 3.0343   | 0.2997 | positive     |
| CCND3   | CDK6     | PRS           | 2.7241   | 0.4935 | positive     |
| RPA2    | RPA3     | PRS           | 2.7224   | 0.2376 | positive     |
| CLB8    | GRB2     | PRS           | 2.6123   | 0.6210 | positive     |
| MAD2L1  | MAD1L1   | PRS           | 2.5199   | 0.2689 | positive     |
| CASP2   | CRADD    | PRS           | 2.4486   | 1.2686 | positive     |
| PEX14   | PEX19    | PRS           | 2.1671   | 0.0056 | positive     |
| NCBP1   | NCBP2    | PRS           | 2.1468   | 0.1112 | positive     |
| JUNB    | BATF     | PRS           | 2.0358   | 0.1987 | positive     |
| CDK2    | CKS1B    | PRS           | 1.8825   | 0.1868 | positive     |
| LCP2    | GRAP2    | PRS           | 1.8606   | 0.2139 | positive     |
| BAD     | BCL2L1   | PRS           | 1.8522   | 0.2456 | positive     |
| BAK1    | BCL2L1   | PRS           | 1.7835   | 0.0973 | positive     |
| PEX19   | PEX3     | PRS           | 1.7696   | 0.1654 | positive     |
| MAFK7   | NFE2L1   | PRS           | 1.7172   | 0.1158 | positive     |
| PPP3CA  | PPP3R1   | PRS           | 1.6785   | 0.1617 | positive     |
| ATF3    | DDIT3    | PRS           | 1.6376   | 0.1419 | positive     |
| GRB2    | VAV1     | PRS           | 1.3884   | 0.1383 | positive     |
| HBA2    | HBB      | PRS           | 1.3613   | 0.2704 | positive     |
| SKP1A   | BTRC     | PRS           | 1.2554   | 0.1391 | positive     |
| ERBB3   | NRG1     | PRS           | 1.2192   | 0.4106 | positive     |
| LMNA    | RB1      | PRS           | 1.1834   | 0.9960 | positive     |
| PEX19   | PEX11B   | PRS           | 1.1795   | 0.2065 | positive     |
| TNFSF10 | TNFSF10B | PRS           | 1.1777   | 0.0620 | positive     |
| RIPK2   | NOD1     | PRS           | 1.1730   | 0.1605 | positive     |
| PEX19   | PEX16    | PRS           | 1.1441   | 0.1416 | positive     |
| RET     | NCBP2    | PRS           | 1.0605   | 0.9735 | positive     |
| HIF1A   | TP53     | PRS           | 1.0160   | 0.0937 | positive     |
| CD2     | CD58     | PRS           | 0.9721   | 0.0868 | positive     |
| MAPK7   | MAP2K5   | PRS           | 0.9482   | 0.0931 | positive     |
| IGF2    | IGFBP4   | PRS           | 0.9430   | 0.1935 | positive     |
| MCM2    | MCM3     | PRS           | 0.9380   | 0.0613 | positive     |
| PSMD4   | RAD23A   | PRS           | 0.9194   | 0.1317 | positive     |
| RIPK2   | PDGFRB   | PRS           | 0.8813   | 0.1399 | positive     |
| LMNA    | LMNB1    | PRS           | 0.8612   | 0.1227 | positive     |
| PSMD4   | NOD1     | PRS           | 0.8452   | 0.3046 | positive     |
| NF2     | HGS      | PRS           | 0.8360   | 0.0436 | positive     |
| S100A1  | S100B    | PRS           | 0.8221   | 0.0467 | positive     |
| XIAP    | CASP9    | PRS           | 0.8110   | 0.0418 | positive     |
| LCP2    | VAV1     | PRS           | 0.7895   | 0.1110 | positive     |
| CEBPB   | FOS      | PRS           | 0.7883   | 0.3406 | positive     |
| RCC1    | R        |               |          |        |              |

**Supplementary Table 4.** Mitochondrial PPIs tested by SIMPL.

| Bait    |                      |                |                                                                                                                                                              | Prey    |                      |                |                                                                                                             | Function                       | Reference                                                                                                                                      |
|---------|----------------------|----------------|--------------------------------------------------------------------------------------------------------------------------------------------------------------|---------|----------------------|----------------|-------------------------------------------------------------------------------------------------------------|--------------------------------|------------------------------------------------------------------------------------------------------------------------------------------------|
| Name    | Alias                | Transit signal | Localization                                                                                                                                                 | Name    | Alias                | Transit signal | Localization                                                                                                |                                |                                                                                                                                                |
| SDHA    | SDH1, SDHF           | N-terminal     | Matrix protein peripheral to inner membrane                                                                                                                  | SDHB    | SDH2                 | N-terminal     | Matrix protein peripheral to inner membrane                                                                 | complex II                     | Sun et al, Cell (2005) 121, 1043-1057                                                                                                          |
| ETF A   | alpha-ETF            | N-terminal     | Matrix                                                                                                                                                       | ETFB    | beta-ETF             | unknown        | Matrix                                                                                                      | ETF complex, OXPHOS complexes  | Toogood et al, J Biol Chem (2004) 279, 32904-32912                                                                                             |
| ETF A   | alpha-ETF            | N-terminal     | Matrix                                                                                                                                                       | ETFRF1  | LYRM5                | unknown        | Matrix                                                                                                      | ETF complex, OXPHOS complexes  | Floyd et al, Mol Cell (2016) 63, 621-632                                                                                                       |
| TIMM10  | TIM10                | middle         | Intermembrane space                                                                                                                                          | TIMM9   | TIM9                 | middle         | Intermembrane space                                                                                         | TIM9/10 complex.               | Webb et al, Mol Cell (2006) 21, 123-133                                                                                                        |
| CHCHD6  | MIC25                | unknown        | Lipid-anchored to inner membrane in the intermembrane space.                                                                                                 | CHCHD3  | MIC19                | unknown        | Lipid-anchored to inner membrane in the intermembrane space.                                                | MICOS complex                  | Kozjak-Pavlovic, Cell Tissue Res (2017) 367: 83-93                                                                                             |
| UQCRC2  | QCR2, UQCR2          | N-terminal     | Matrix side peripheral protein to inner membrane                                                                                                             | UQCRC2  | QCR2, UQCR2          | N-terminal     | Matrix side peripheral protein to inner membrane                                                            | complex III                    | Guo et al, Cell (2017) 170, 1247-1257                                                                                                          |
| TIMM50  | TIM50, TIM50L        | N-terminal     | Transmembrane protein at the inner mitochondrial membrane, exposing the C-terminus to the intermembrane space with interacting with TIMM23 N-terminal domain | TIMM23  | TIM23                | unknown        | Inner membrane multiple transmembrane protein with N-terminus in the intermembrane space                    | TIM23 complex                  | Geissler et al, Cell (2002) 111, 507-518; Yamamoto et al, Cell 111 (2002), 519-528; Demishtein-Zohary et al, Cell Tissue Res (2017) 367, 33-41 |
| ATP5MC1 | ATP5G1, ATP5A, ATP5G | N-terminal     | Multipass transmembrane protein in the inner membrane with both N- and C-termini in the intermembrane space                                                  | ATP5MC1 | ATP5G1, ATP5A, ATP5G | N-terminal     | Multipass transmembrane protein in the inner membrane with both N- and C-termini in the intermembrane space | Fo complex of ATPase           | Rastogi et al, Nature (1999) 402, 263-268                                                                                                      |
| NDUFV1  | UQOR1, CI51KD        | N-terminal     | Matrix protein peripheral to inner membrane                                                                                                                  | NDUFV3  | CI9KD                | N-terminal     | Matrix protein peripheral to inner membrane                                                                 | N module of complex I          | Guo et al, Cell (2017) 170, 1247-1257                                                                                                          |
| PDHA1   | PHE1A, PDHA, PDHAD   | N-terminal     | Matrix                                                                                                                                                       | PDHB    | PHE1B, PDHE1B, PDHBD | N-terminal     | Matrix                                                                                                      | Pyruvate dehydrogenase complex | Ciszak et al, J Biol Chem (2003) 278, 21240-21246                                                                                              |

Supplementary Table 5. *C. elegans* reference set studied by SIMPL

| #  | Reference Set | Bait Protein (IN-V5/HA) |                 | Prey Protein (IC/CIC-FLAG) |                 | Configuration |        | ELISA Value Replicate 1 |        | ELISA Value Replicate 2 |        | PPI Description/Homologs                                                                                                    | Source | Pubmed ID                |
|----|---------------|-------------------------|-----------------|----------------------------|-----------------|---------------|--------|-------------------------|--------|-------------------------|--------|-----------------------------------------------------------------------------------------------------------------------------|--------|--------------------------|
|    |               | CDS                     | Protein         | CDS                        | Protein         | IN/IC         | IN/CIC | IN/IC                   | IN/CIC | IN/IC                   | IN/CIC |                                                                                                                             |        |                          |
| 1  | Positive      | I05H4.2                 | <b>FBXA-196</b> | F46A9.4                    | <b>SKR-2</b>    | Yes           | Yes    | 0.81                    | 1.1    | 0.51                    | 0.28   | SKP1/F-Box Domain                                                                                                           | CePRS  |                          |
| 2  | Positive      | Y45F10C.3               | <b>FBXA-215</b> | F46A9.4                    | <b>SKR-2</b>    | Yes           | Yes    | 0.84                    | 0.73   | 0.58                    | 0.42   | SKP1/F-Box Domain                                                                                                           | CePRS  |                          |
| 3  | Positive      | ZK792.6                 | <b>LET-60</b>   | AC7.2                      | <b>SOC-2</b>    | Yes           | Yes    | 1.2                     | 0.79   | 0.59                    | 0.70   | SHOC2/HRAS                                                                                                                  | CePRS  |                          |
| 4  | Positive      | F53F10.5                | <b>NPP-11</b>   | K07F5.13                   | <b>NPP-1</b>    | Yes           | inj.   | 1.8                     | -      | 0.92                    | -      | Nuclear pore complex components Nup54 and Nup62                                                                             | LIT/EE | <a href="#">7531196</a>  |
| 5  | Positive      | F58F6.4                 | <b>RFC-2</b>    | F44B9.8                    | <b>F44B9.8</b>  | Yes           | inj.   | 0.66                    | -      | 0.88                    | -      | RFC5/RFC2 Replication factor subunits                                                                                       | LIT/EE | <a href="#">15201901</a> |
| 6  | Positive      | T10E9.1                 | <b>T10E9.1</b>  | F46A9.4                    | <b>SKR-2</b>    | Yes           | inj.   | 0.78                    | -      | 0.55                    | -      | SKP1/F-Box Domain                                                                                                           | CePRS  |                          |
| 7  | Positive      | T05G5.3                 | <b>CDK-1</b>    | ZC168.4                    | <b>CYB-1</b>    | inj.          | Yes    | -                       | 1.1    | -                       | 0.80   | Cyclin B2/Cyclin Dependent Kinase 1                                                                                         | LIT/EE | <a href="#">7575488</a>  |
| 8  | Positive      | C06G3.10                | <b>COGC-2</b>   | Y51H7C.6                   | <b>COGC-4</b>   | n.c.          | n.c.   | -                       | -      | -                       | -      | COG2/COG4 (component of oligomeric golgi complex 4)                                                                         | LIT/EE | <a href="#">15047703</a> |
| 9  | Positive      | F10B5.6                 | <b>EMB-27</b>   | B0511.9                    | <b>CDC-26</b>   | inj.          | inj.   | -                       | -      | -                       | -      | Cdc26p and Cdc16p components of the anaphase promoting complex                                                              | LIT/EE | <a href="#">8895471</a>  |
| 10 | Positive      | K08B4.1                 | <b>LAG-1</b>    | C32A3.1                    | <b>SEL-8</b>    | n.c.          | n.c.   | -                       | -      | -                       | -      | CSL (C BF-1, 5 u(H), L ag-1)/Mastermind                                                                                     | CePRS  |                          |
| 11 | Positive      | F58A3.1                 | <b>LDB-1</b>    | F46C8.5                    | <b>CEH-14</b>   | n.c.          | n.c.   | -                       | -      | -                       | -      | LDB2 (LIM domain binding 2)/LHX3 (LIM homeobox 3) and LHX4 (LIM homeobox 4)                                                 | CePRS  |                          |
| 12 | Positive      | M7.1                    | <b>LET-70</b>   | F54G8.4                    | <b>NHL-1</b>    | n.c.          | n.c.   | -                       | -      | -                       | -      | UBE2D2 (ubiquitin conjugating enzyme E2 D2)/TRIM2 (tripartite motif containing 2) and TRIM3 (tripartite motif containing 3) | CePRS  |                          |
| 13 | Positive      | F59E12.5                | <b>NPL-4.2</b>  | F19B6.2                    | <b>UFD-1</b>    | n.c.          | n.c.   | -                       | -      | -                       | -      | NPL0C4 (NPL4 homolog, ubiquitin recognition factor)/UFD1 (ubiquitin recognition factor in ER associated degradation 1)      | LIT/EE | <a href="#">10811609</a> |
| 14 | Positive      | F59A2.1                 | <b>NPP-9</b>    | K01G5.4                    | <b>RAN-1</b>    | n.c.          | n.c.   | -                       | -      | -                       | -      | RANBP1 (RAN binding protein 1)/RAN (RAN, member RAS oncogene family)                                                        | LIT/EE | <a href="#">7603572</a>  |
| 15 | Positive      | F21C3.4                 | <b>RDE-2</b>    | F21C3.4                    | <b>RDE-2</b>    | n.c.          | n.c.   | -                       | -      | -                       | -      | RDE2 RNA interference protein                                                                                               | CePRS  |                          |
| 16 | Positive      | M03D4.1                 | <b>ZEN-4</b>    | B0207.4                    | <b>AIR-2</b>    | inj.          | inj.   | -                       | -      | -                       | -      | Aurora Kinase C/KIF23                                                                                                       | CePRS  |                          |
| 17 | Positive      | Y37H2A.5                | <b>FBXA-210</b> | F46A9.4                    | <b>SKR-2</b>    | inj.          | inj.   | -                       | -      | -                       | -      | SKP1/F-Box Domain                                                                                                           | CePRS  |                          |
| 18 | Positive      | Y113G7B.5               | <b>FOG-2</b>    | T23G11.3                   | <b>GLD-1</b>    | inj.          | inj.   | -                       | -      | -                       | -      | QKI (QKI, KH domain containing RNA binding)/Germline protein                                                                | CePRS  |                          |
| 19 | Positive      | M7.1                    | <b>LET-70</b>   | F16A11.1                   | <b>F16A11.1</b> | n.c.          | n.c.   | -                       | -      | -                       | -      | UBE2D2 (ubiquitin conjugating enzyme E2 D2)/RSPRY1 (ring finger and SPRY domain containing 1)                               | CePRS  |                          |
| 20 | Positive      | M7.1                    | <b>LET-70</b>   | C45G7.4                    | <b>C45G7.4</b>  | n.c.          | n.c.   | -                       | -      | -                       | -      | UBE2D2 (ubiquitin conjugating enzyme E2 D2)/TRIM13                                                                          | CePRS  |                          |
| 21 | Positive      | ZK1098.8                | <b>MUT-7</b>    | F21C3.4                    | <b>RDE-2</b>    | n.c.          | n.c.   | -                       | -      | -                       | -      | EXD3 (exonuclease 3'-5' domain containing 3)/RDE2 involved in RNA interference                                              | CePRS  |                          |
| 22 | Positive      | R06F6.5                 | <b>NPP-19</b>   | Y37E3.15                   | <b>NPP-13</b>   | inj.          | inj.   | -                       | -      | -                       | -      | Nuclear pore complex components Nup35 and Nup93                                                                             | LIT/EE | <a href="#">16631361</a> |
| 23 | Positive      | Y49E10.14               | <b>PIE-1</b>    | F59B2.6                    | <b>ZIF-1</b>    | inj.          | inj.   | -                       | -      | -                       | -      | mRNA 3'-UTR binding activity/ubiquitin-dependent protein                                                                    | CePRS  |                          |
| 24 | Positive      | T27F2.1                 | <b>SKP-1</b>    | K08B4.1                    | <b>LAG-1</b>    | n.c.          | n.c.   | -                       | -      | -                       | -      | SNW1 (SNCSL (CBF-1, Su(H), Lag-1)W domain containing 1)/SKP1/F-Box Domain                                                   | CePRS  |                          |
| 25 | Positive      | T07E3.4                 | <b>T07E3.4</b>  | F46A9.4                    | <b>SKR-2</b>    | inj.          | inj.   | -                       | -      | -                       | -      | SKP1/F-Box Domain                                                                                                           | CePRS  |                          |
| 26 | Positive      | Y39G10AR.12             | <b>TPXL-1</b>   | K07C11.2                   | <b>AIR-1</b>    | inj.          | inj.   | -                       | -      | -                       | -      | Interaction between Aurora A kinase and microtubule binding protein TPX2                                                    | LIT/EE | <a href="#">16054030</a> |
| 27 | Positive      | Y54E5B.4                | <b>UBC-16</b>   | F54G8.4                    | <b>NHL-1</b>    | n.c.          | n.c.   | -                       | -      | -                       | -      | UBE2W (ubiquitin conjugating enzyme E2 W)/TRIM2 (tripartite motif containing 2) and TRIM3 (tripartite motif containing 3)   | CePRS  |                          |

**Key to Abbreviations**

Yes = Line successfully established and analyzed by SIMPL ELISA platform  
n.c. = not cloned / cloning unsuccessful  
inj. = injected, but no transgenic line could be established with expression of both Bait and Prey  
CePRS = *C. elegans* Positive Reference Set  
LIT/EE = Literature derived and previously confirmed by yeast two-hybrid.  
Description/Homolog information from WormBase

# Supplementary Figure 1

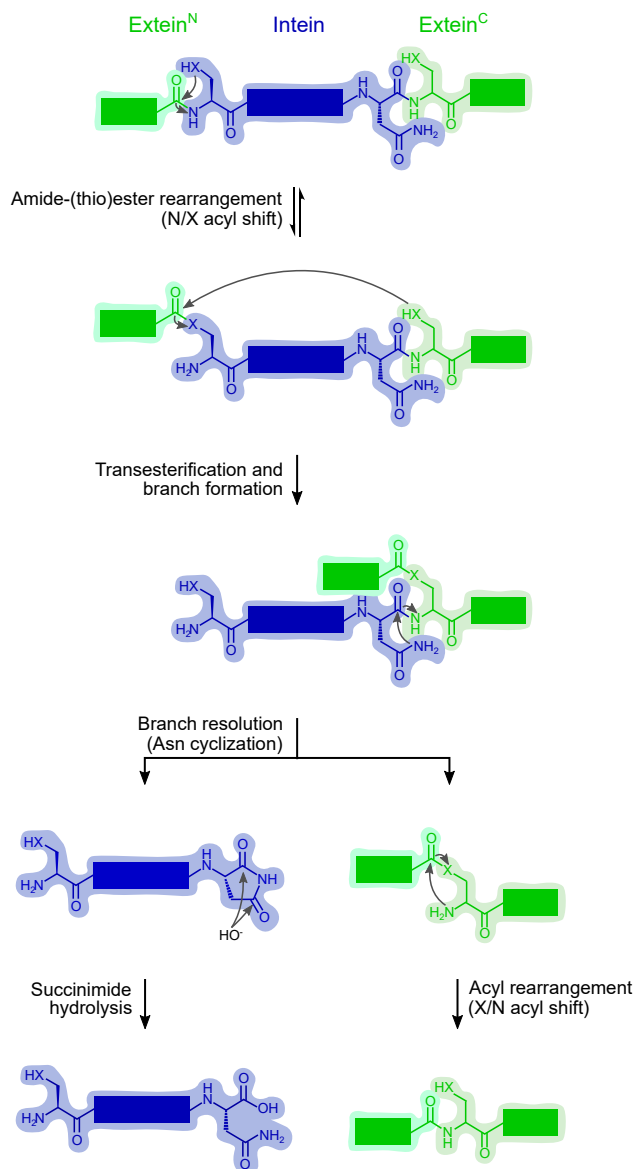

**Supplementary Figure 1.** Mechanism of protein splicing reaction. “X” stands for a sulfur (“S”) or oxygen (“O”) atom.



## Supplementary Figure 2

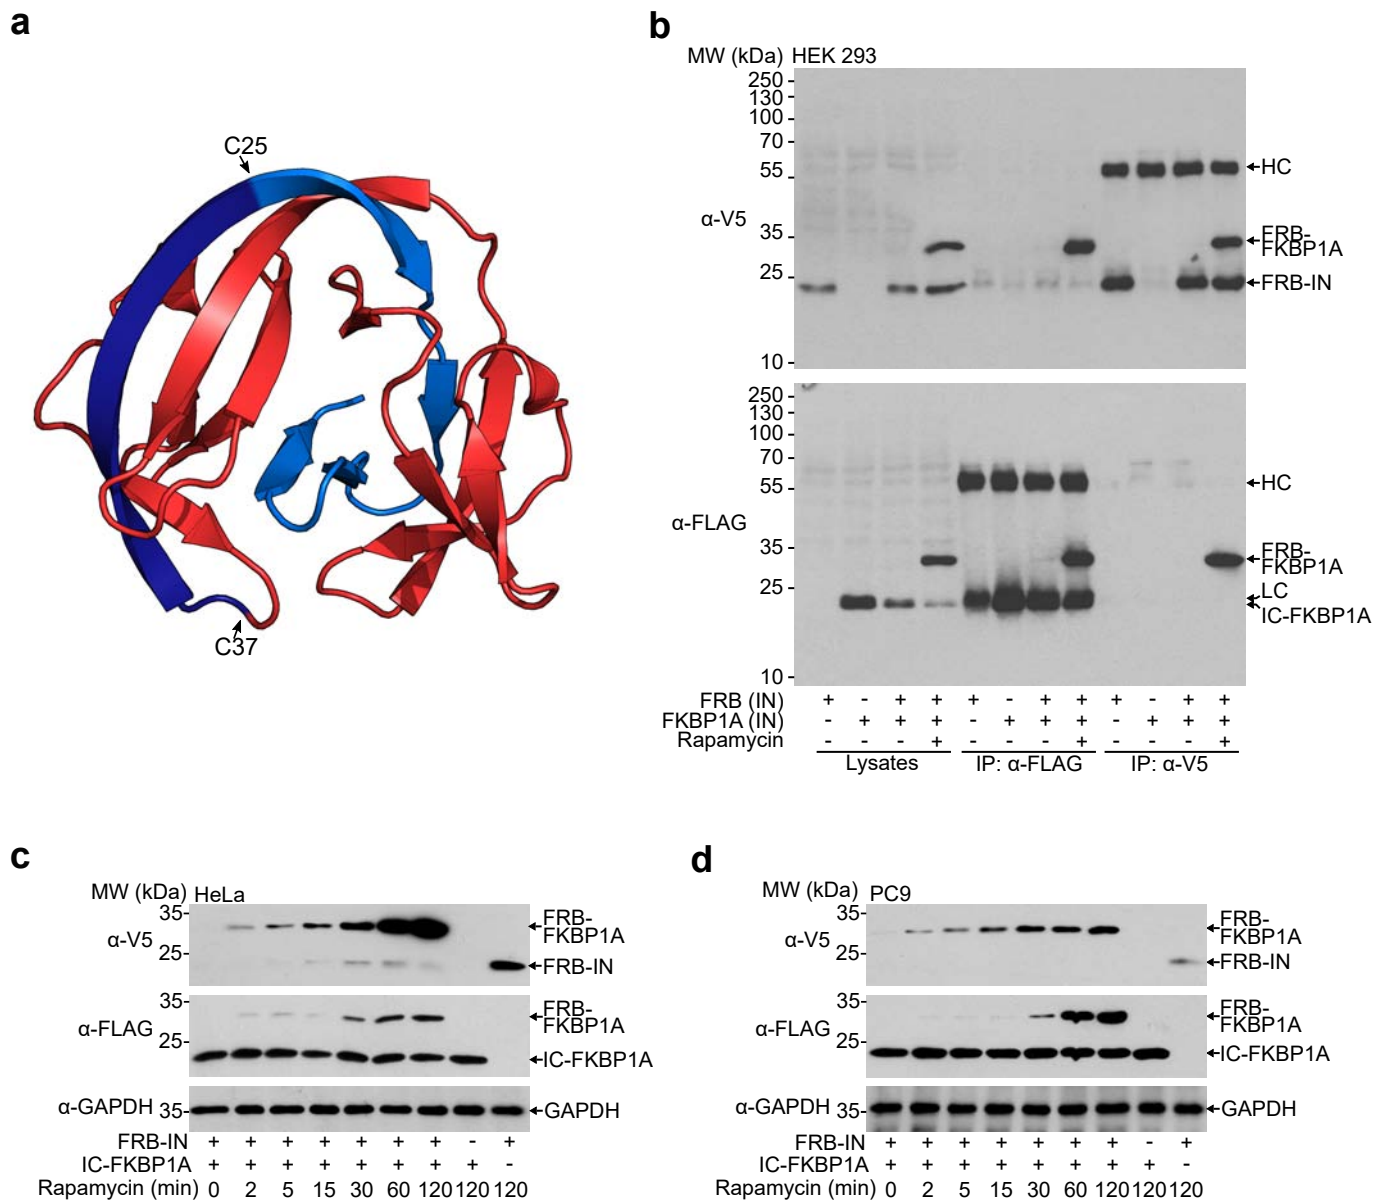

**Supplementary Figure 2.** Setting up the SIMPL system. **(a)** Crystal structure of GP41-1 split intein. Crystal coordinate file 6QAZ was retrieved from PDB (Beyer et al, 2019). The natural splitting site at C37 and the resplitting site (C25) used in the SIMPL system are highlighted. **(b)** Characterizing the identity of spliced protein with immunoprecipitation. Cells expressing FRB-IN, IC-FKBP1A or both were treated with rapamycin or left untreated. The proteins were immunoprecipitated with  $\alpha$ -FLAG or  $\alpha$ -V5 antibodies and subjected to Western analysis with indicated antibodies. HC: antibody heavy chain; LC: light chain. The blot is representative for three independent experiments. **(c-d)** Time course of rapamycin-induced FRB/FKBP interaction in HeLa (c) and PC9 (d) cells. Cells were transfected with FRB-IN and IC-FKBP1A and treated with rapamycin (100 nM) for different periods of time, as indicated, followed by Western blot analysis. The blot is representative for three independent experiments.

# Supplementary Figure 3

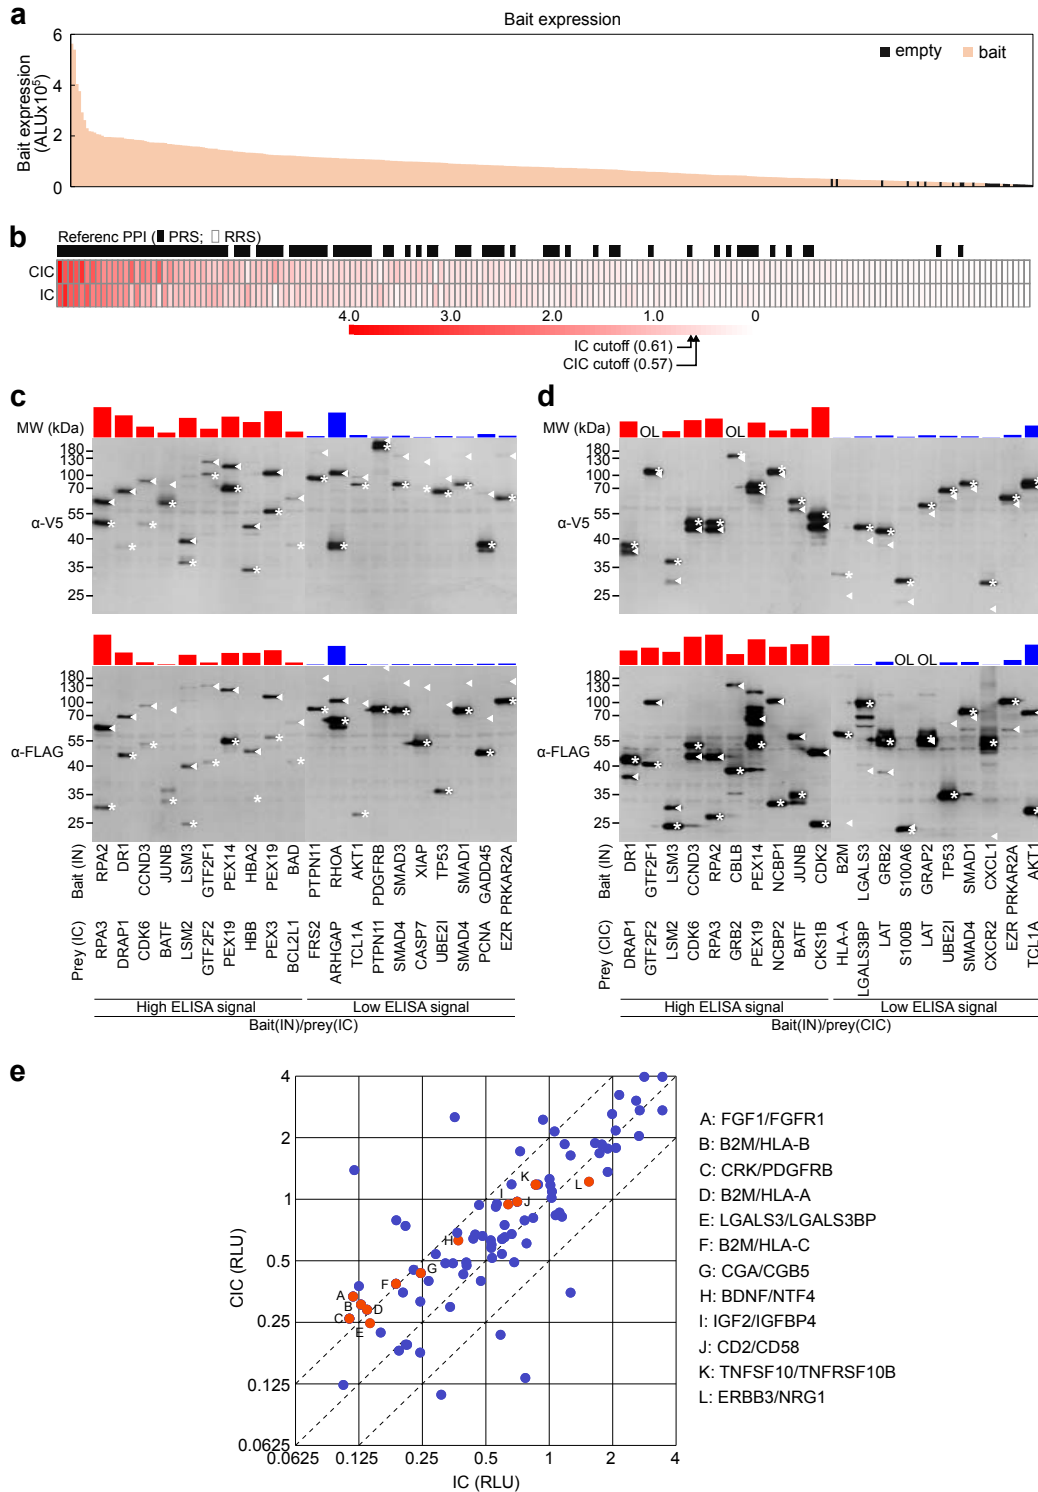

**Supplementary Figure 3.** Performance of ELISA coupled SIMPL evaluated with reference PPIs. **(a)** Plot of bait expression for data in Fig. 3d. Samples with mock transfection or unrelated vectors are highlighted with black. **(b)** Heatmap of splicing signal (normalized by bait signal) with prey in either IC format or CIC format. PRS pairs are symbolized with black rectangles and the RRS pairs are symbolized with white rectangles in the upper row. **(c-d)** Comparison of SIMPL ELISA and Western blot readouts. PPI pairs from the PRS, either in IN/IC (c) or IN/CIC format (d), with high signal or low signal obtained in ELISA assay, were re-tested by Western blot. Bands of parental proteins are highlighted with asterisks. Bands of spliced proteins or their predicted positions are labelled with triangles. The densities of spliced bands were quantified and are presented as bar graphs above the blots. OL indicates overlap of a spliced band and its parental bands, which prevents accurate measurement of the band. In each panel, electrophoreses were performed on two separate gels but the samples were transferred and probed on the same nitrocellulose membrane. **(e)** Comparison of the performance of IC and CIC prey formats. The SIMPL readings in (b-c) from the PRS analysis (Fig. 3d) are plotted as IC vs CIC. Prey proteins with signal peptides are highlighted in red and listed at the right side of the scatter plot. Data are presented in logarithmic scale.

## Supplementary Figure 4

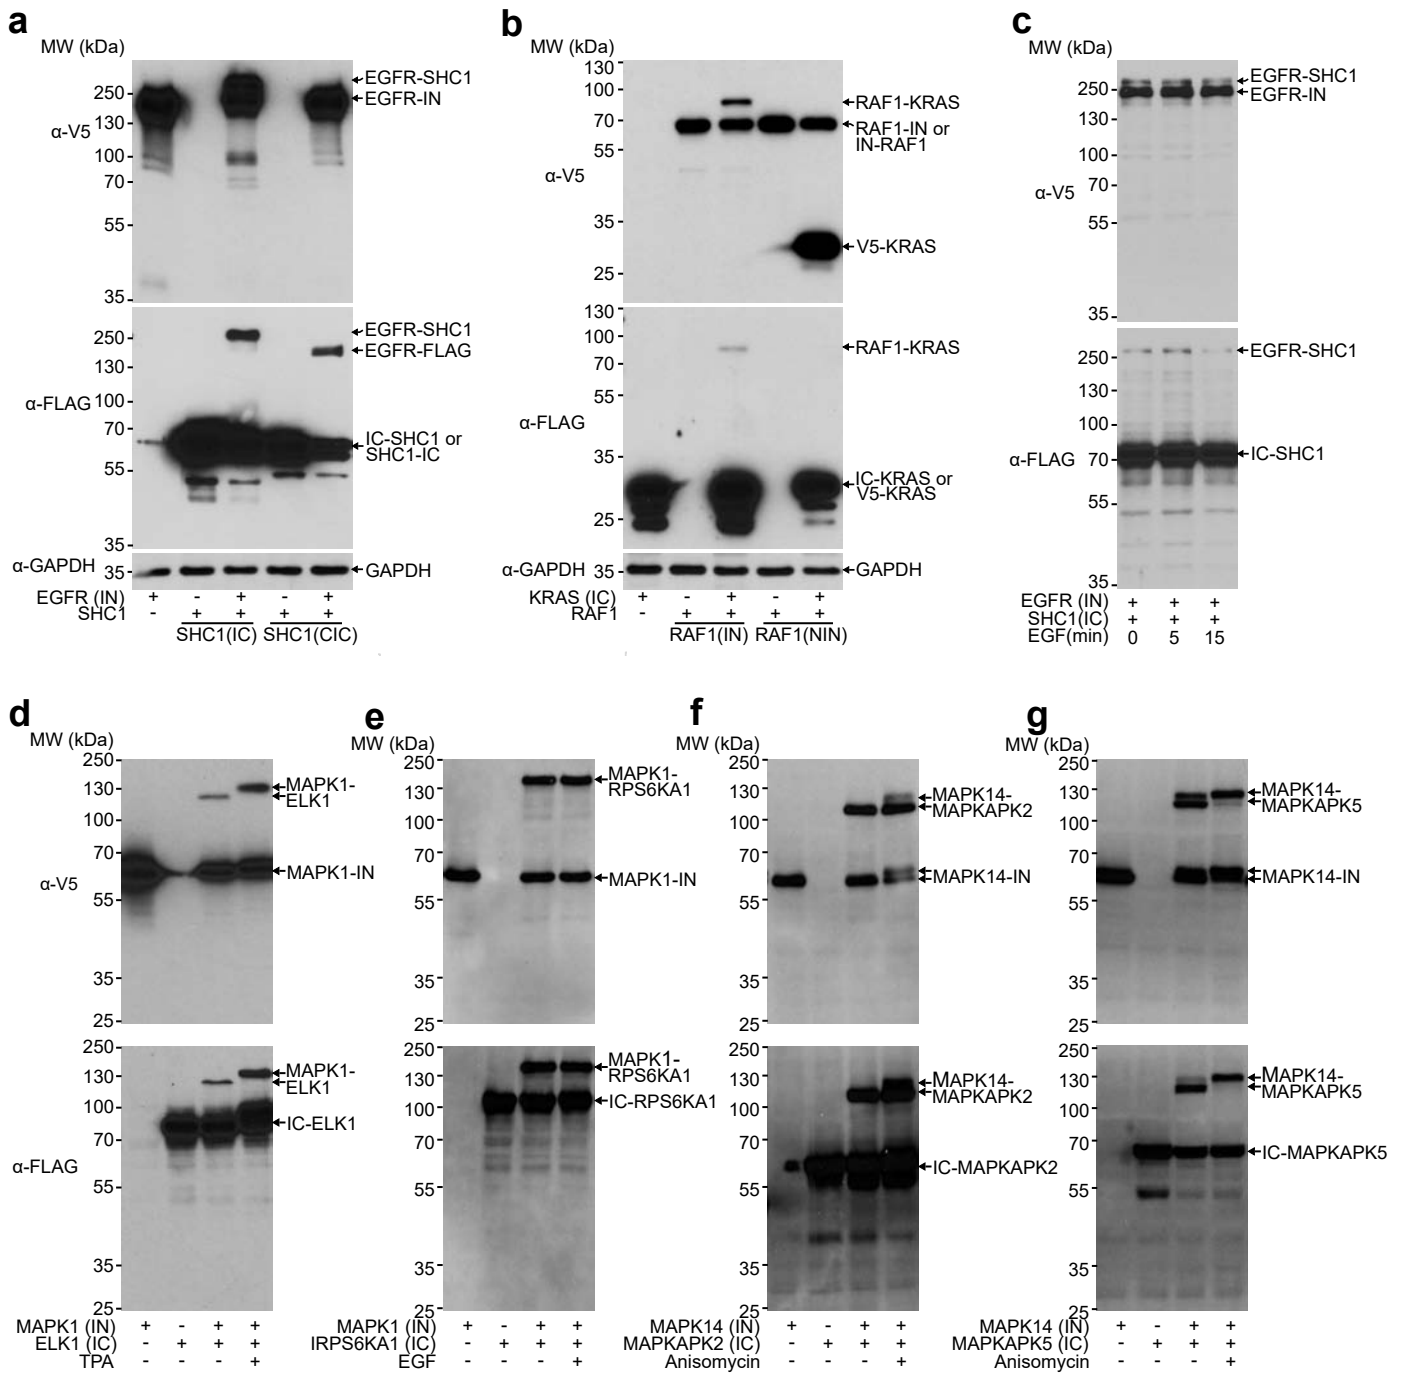

**Supplementary Figure 4.** Using SIMPL to study physiological PPIs. **(a)** The interaction between EGFR (in IN format) and SHC1 were detected with either SHC1 (IC) or SHC1 (CIC) formats. **(b)** KRAS (in IC format)/RAF1 interaction were detected with both RAF1-IN and NIN-RAF1 formats. Each blot in (a,b) is representative for three independent experiments. **(c)** EGFR (IN) and SHC1 (IC) were co-transfected into HEK 293 cells. After 16 hours starvation (DMEM supplemented with 0.1% FCS), the cells were stimulated with EGF (100 ng/ml) for indicated periods of time. The cells were subjected to Western blot analysis. The blot is representative for four independent experiments. **(d-g)** Kinase/substrate interactions were followed by SIMPL. The plasmids coding the indicated kinases in IN format and related substrates in IC format were transfected in HEK 293 Flp-In T-Rex cells. The expression was induced by incubation with tetracycline for 6 hrs in starvation medium. The indicated kinases are either in basal state or activated by related stimulation for 30 mins. Activation of the kinases can be judged by the mobility up-shift of substrate and spliced bands derived from phosphorylation. Each blot in (d-g) is representative for two to three independent experiments.

# Supplementary Figure 5

## Positive Reference Set Pairs

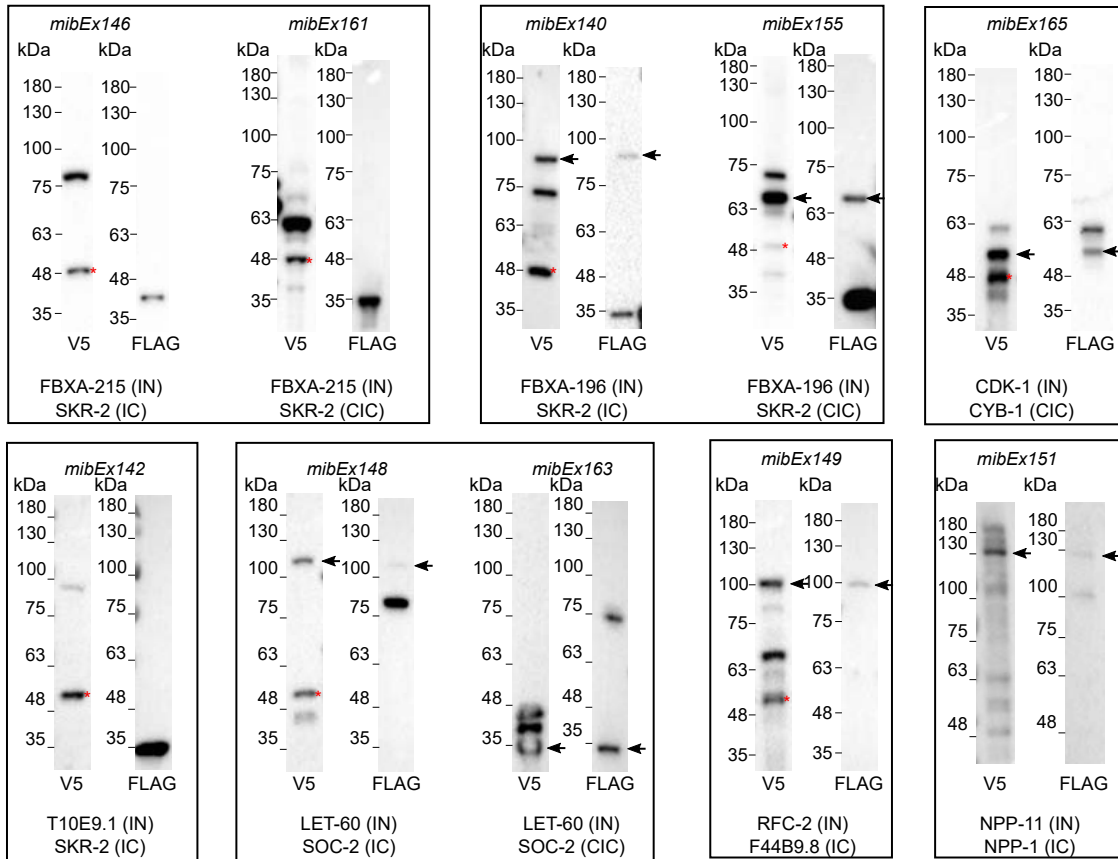

## Random Reference Set Pairs

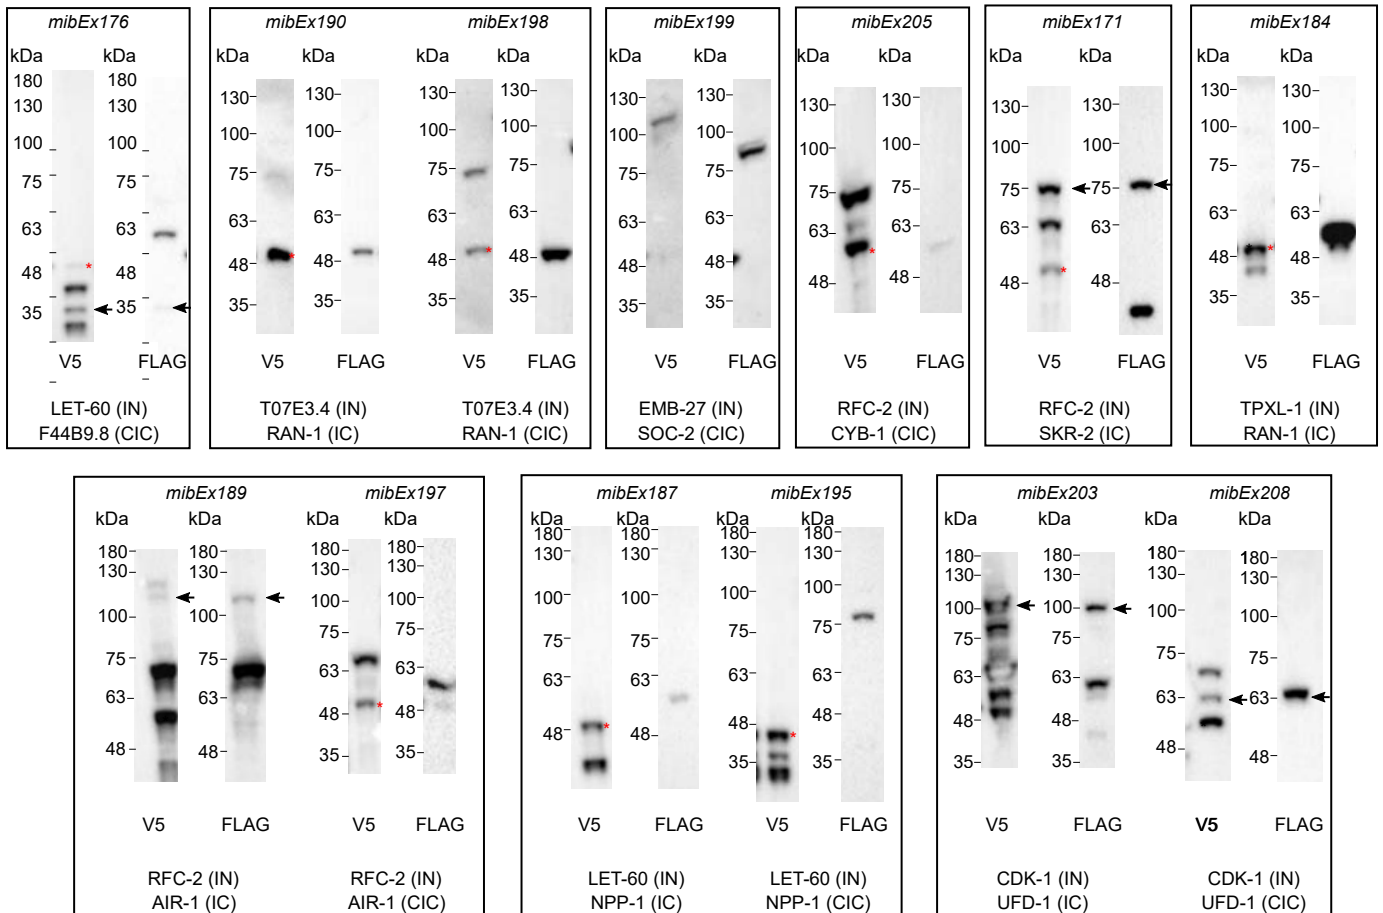

**Supplementary Figure 5.** Western blot screen results of *C. elegans* lines. Western blot results for the *C. elegans* SIMPL lines generated. Analysis of each protein pair consists of a blot using the V5 antibody to detect the Prey protein, and the FLAG antibody to detect the Bait protein. Size in kilodaltons is shown for each blot. Red asterisk indicates a non-specific V5 band, while splicing is indicated by a black arrow at the expected product size. The blot is representative for two independent experiments.
